# Supplementary material
Source: PubMed Central journal article supplement (PMC4449705)
Supplement: Supp_Fig2.pdf [file Supp_Fig2.pdf]

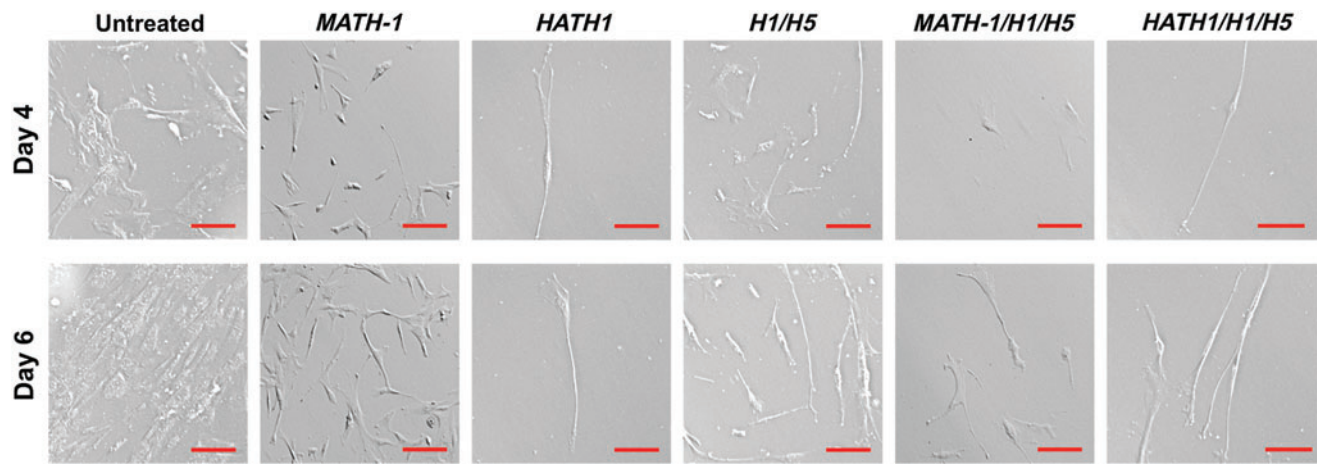

**SUPPLEMENTARY FIG. S2.** PlasDIC light microscopy of hWJCs. Untreated hWJCs displayed a fibroblast-like morphology 4 days after plating. *MATH-1*-transfected hWJCs mostly displayed a fibroblastic morphology. hWJCs transfected with *HATH1* and/or siRNA against *HES1* and *HES5* displayed an elongated bipolar morphology 4 days after transfection, and multiple cell morphologies were observed 6 days after transfection, which included elongated bipolar morphologies, bulb-like morphologies, and branching morphologies, and select cells appeared to be pear shaped. Cell density steadily increased after transfection. Images were obtained using PlasDIC microscopy (Zeiss). Images are representative of cells from five different umbilical cords ( $n=5$ ). *MATH-1* represents cells transfected with *MATH-1* pDNA. *HATH1* represents cells transfected with *HATH1* pDNA. *H1/H5* represents cells transfected with *HES1* and *HES5* siRNA. *MATH-1/H1/H5* represents cells cotransfected with *MATH-1* pDNA, *HES1* siRNA, and *HES5* siRNA. *HATH1/H1/H5* represents cells cotransfected with *HATH1* pDNA, *HES1* siRNA, and *HES5* siRNA. Scale bar = 50  $\mu$ m.
