# Supplementary material
Source: PubMed Central journal article supplement (PMC4449705)
Supplement: Supp_Table1.pdf [file Supp_Table1.pdf]

SUPPLEMENTARY TABLE S1. TAQMAN PRIMERS USED FOR REAL-TIME QUANTITATIVE POLYMERASE CHAIN REACTION

| <i>Gene name</i>                                    | <i>Gene symbol</i> | <i>Species</i> | <i>Dye</i> | <i>Entrez gene ID</i> | <i>Life Technologies ID</i> |
|-----------------------------------------------------|--------------------|----------------|------------|-----------------------|-----------------------------|
| Atonal homolog 1                                    | <i>ATOH1</i>       | Human          | Fam        | 474                   | Hs00944192_s1               |
| BarH-like homeobox 1                                | <i>BARHL1</i>      | Human          | Fam        | 56751                 | Hs01063929_m1               |
| Glyceraldehyde-3-phosphate dehydrogenase            | <i>GAPDH</i>       | Human          | Fam        | 2597                  | Hs02758991_g1               |
| Growth factor independent 1 transcription repressor | <i>GF11</i>        | Human          | Fam        | 2672                  | Hs00382207_m1               |
| Hes family bHLH transcription factor 1              | <i>HES1</i>        | Human          | Fam        | 3280                  | Hs00172878_m1               |
| Hes family bHLH transcription factor 5              | <i>HES5</i>        | Human          | Fam        | 388585                | Hs01387463_g1               |
| Jagged 1                                            | <i>JAG1</i>        | Human          | Fam        | 182                   | Hs01070032_m1               |
| Jagged 2                                            | <i>JAG2</i>        | Human          | Fam        | 3714                  | Hs00171432_m1               |
| Myosin VI                                           | <i>MYO6</i>        | Human          | Fam        | 4646                  | Hs01568216_m1               |
| Myosin VIIA                                         | <i>MYO7A</i>       | Human          | Fam        | 4647                  | Hs00934542_m1               |
| Notch 1                                             | <i>NOTCH1</i>      | Human          | Fam        | 4851                  | Hs01062014_m1               |
| POU class 4 homeobox 3                              | <i>POU4F3</i>      | Human          | Fam        | 5459                  | Hs00231275_m1               |
| SRY (sex-determining region Y)-box 2                | <i>SOX2</i>        | Human          | Fam        | 6657                  | Hs01053049_s1               |

Life Technologies ID is the catalog reference number that identifies the TaqMan assays that were used. *POU4F3* is also known as *BRN3C*.
