# Supplementary material
Source: PubMed Central journal article supplement (PMC4449705)
Supplement: Supp_Table2.pdf [file Supp_Table2.pdf]

SUPPLEMENTARY TABLE S2. CELL CHARACTERIZATION

| <i>Passage number</i> | <i>Day</i> | <i>Group</i>        | <i>CD34</i><br>(-), % | <i>CD45</i><br>(-), % | <i>CD73</i><br>(+), % | <i>CD90</i><br>(+), % | <i>CD105</i><br>(+), % | <i>STRO-1</i><br>(+), % |
|-----------------------|------------|---------------------|-----------------------|-----------------------|-----------------------|-----------------------|------------------------|-------------------------|
| P2-5                  | 10         | Untreated           | 99.58±0.34            | 86±14                 | 4.0±2.7               | 92.0±5.6              | 1.2±1.4                | 0.31±0.29               |
|                       |            | <i>MATH-1</i>       | 96.2±7.6              | 84±14                 | 10±10                 | 77±40                 | 2.3±3.1                | 4.1±6.4                 |
|                       |            | <i>HATH1</i>        | 98.8±2.0              | 83±19                 | 4.9±3.4               | 93.1±8.5              | 0.50±0.70              | 0.46±0.90               |
|                       |            | <i>H1/H5</i>        | 99.74±0.49            | 89±14                 | 2.3±1.7               | 93.9±6.4              | 0.06±0.07              | 0.03±0.02               |
|                       |            | <i>MATH-1/H1/H5</i> | 99.4±1.2              | 80±23                 | 4.0±4.4               | 81±34                 | 0.10±0.14              | 0.13±0.17               |
|                       |            | <i>HATH1/H1/H5</i>  | 97.8±4.8              | 86±10                 | 8.5±15                | 93.6±7.1              | 0.10±0.07              | 0.09±0.16               |

Values are presented as means with standard deviations. P2-5 indicates that cells were thawed at P2 and subcultured to P5 for use in experiments. The values are representative of cells from five different umbilical cords ( $n=5$ ).
